# Supplementary material for: Rapid Dissemination of blaNDM-5 Gene among Carbapenem-Resistant Escherichia coli Isolates in a Yellow-Feather Broiler Farm via Multiple Plasmid Replicon
Source: MDPI journal article supplement (doi:10.3390/pathogens13050387), 2024-05-07
Supplement: s1 [file s1]

Table S1 Primers of PCR mapping

| Name | Prime Sequence (5' to 3')                         | Target fragment |
|------|---------------------------------------------------|-----------------|
| P1   | F:GCGTAGCGTTTCCATAGCGG<br>R:GTTGACGGGTCTTTGGTGCT  | 1912 bp         |
| P2   | F:CCAATGCCATCGTTTACTTC<br>R:CGCTTATTCGCACCTTCCCT  | 1428 bp         |
| P3   | F:GGTGACAGGCAGTGTAAAGAG<br>R:TTTGAAATAGCCCAGCAGTA | 1251 bp         |
| P4   | F:CAGAATGAACATCCGCACCT<br>R:CCCGTCCACAATAGCAAAGT  | 1756 bp         |
| P5   | F:TGAAATGGCATGGGAATGAG<br>R:TTTCTGCGACAGTGATAGCG  | 1294 bp         |

Note: F: forward primer; R: reverse primer.

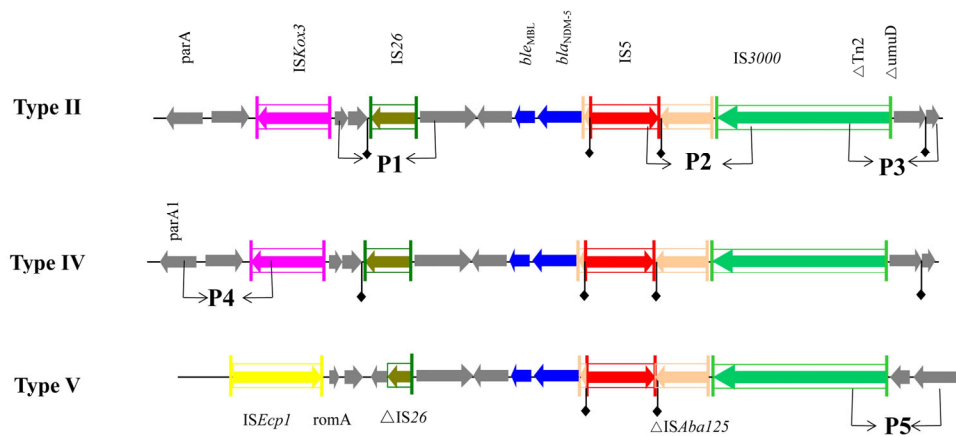

Figure S1. Liner comparison of the *mcr-1*-carrying plasmids. Arrows indicate the positions of the genes and the direction. Regions with > 99% homology are shaded in gray. (A) IncI2 plasmid. (B) IncX4 plasmid.

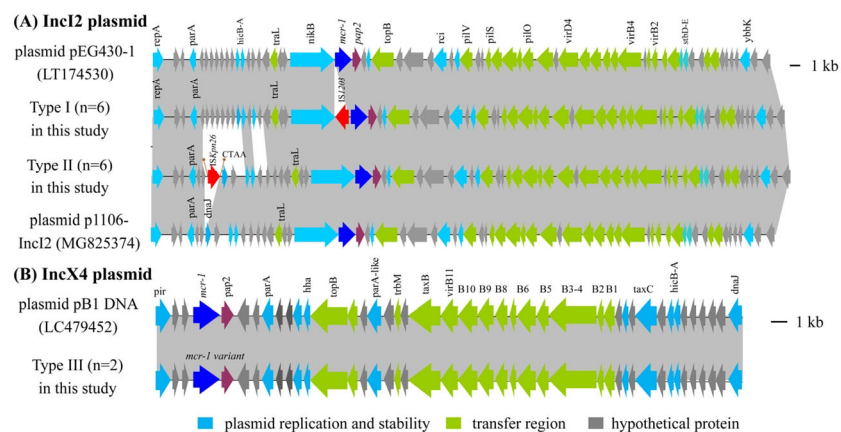

Table S2 Characterization of 40 *bla*<sub>NDM-5</sub>-positive *E. coli* isolates from various sources in the chicken farm

| Strain   | Source | MLST   | Surrounding regions of <i>bla</i> <sub>NDM-5</sub> | Location of <i>mcr-1</i> and <i>mcr-1</i> variant | Other resistance phenotype <sup>a</sup> | Transconjugants <sup>b</sup> |
|----------|--------|--------|----------------------------------------------------|---------------------------------------------------|-----------------------------------------|------------------------------|
| GZB8C1M  | feces  | ST10   | Type II                                            | -                                                 | TET/FLR/CIP/SXT                         | +                            |
| GZB8C2M  | feces  | ST6802 | Type II                                            | -                                                 | GEN/TET/FLR/CIP                         | +                            |
| GZB8C4M  | feces  | ST8318 | Type I                                             | <i>mcr-1</i> /IncX4                               | GEN/TET/FLR/CL/FOS/CIP/SXT              | +                            |
| GZB8C8M  | feces  | ST8318 | Type I                                             | -                                                 | GEN/TET/FLR/FOS/CIP/SXT                 | +                            |
| GZB8C9M  | feces  | ST6725 | Type II                                            | -                                                 | GEN/TET/FLR/FOS/CIP/SXT                 | +                            |
| GZB8C10M | feces  | ST6725 | Type II                                            | -                                                 | GEN/TET/FLR/FOS/CIP/SXT                 | +                            |
| GZB8C14M | feces  | ST167  | Type IV                                            | <i>mcr-1</i> /IncI2                               | GEN/AMI/TET/FLR/CL/FOS/CIP/SXT          | -                            |
| GZB8C15M | feces  | ST167  | Type IV                                            | <i>mcr-1</i> /IncI2                               | GEN/AMI/TET/FLR/CL/FOS/CIP/SXT          | -                            |
| GZB8C20M | feces  | ST746  | Type V                                             | <i>mcr-1</i> /IncI2                               | GEN/TET/FLR/CL/FOS/CIP/SXT              | +                            |
| GZB8C26M | feces  | ST167  | Type IV                                            | <i>mcr-1</i> /IncI2                               | GEN/AMI/TET/FLR/CL/FOS/CIP/SXT          | -                            |
| GZB8C37M | feces  | ST167  | Type IV                                            | -                                                 | TET/FLR/CIP/SXT                         | -                            |
| GZB8C38M | feces  | ST167  | Type IV                                            | -                                                 | GEN/AMI/TET/FLR/FOS/CIP/SXT             | -                            |
| GZB8C41M | feces  | ST167  | Type IV                                            | -                                                 | GEN/AMI/TET/FLR/FOS/CIP/SXT             | -                            |
| GZB8C45M | feces  | ST6746 | Type II                                            | -                                                 | GEN/TET/FLR/CIP/SXT                     | +                            |
| GZB8C46M | feces  | ST6725 | Type II                                            | <i>mcr-1</i> /IncX4                               | GEN/TET/FLR/CL/CIP/SXT                  | +                            |
| GZB8C53M | feces  | ST167  | Type IV                                            | -                                                 | GEN/AMI/TET/FLR/FOS/CIP/SXT             | -                            |
| GZB8C54M | feces  | ST746  | Type V                                             | -                                                 | GEN/TET/FLR/CIP/SXT                     | +                            |
| GZB8C56M | feces  | ST746  | Type V                                             | <i>mcr-1</i> /IncI2                               | GEN/TET/FLR/CL/CIP/SXT                  | +                            |
| GZB8C57M | feces  | ST167  | Type IV                                            | <i>mcr-1</i> /IncI2                               | GEN/AMI/TET/FLR/CL/FOS/CIP/SXT          | -                            |
| GZB8C58M | feces  | ST167  | Type IV                                            | -                                                 | GEN/AMI/TET/FLR/FOS/CIP/SXT             | -                            |
| GZB8C59M | feces  | ST10   | Type V                                             | <i>mcr-1</i> /IncI2                               | TET/FLR/CL//FOS/SXT                     | +                            |
| GZB8C60M | feces  | ST10   | Type V                                             | <i>mcr-1</i> /IncI2                               | TET/FLR/CL//FOS/SXT                     | +                            |

|           |                |        |          |                     |                                |   |
|-----------|----------------|--------|----------|---------------------|--------------------------------|---|
| GZB8C66M  | heart          | ST746  | Type V   | -                   | GEN/TET/FLR/SXT                | + |
| GZB8C93M  | spleen         | ST10   | Type I   | -                   | TET/FLR/CIP/SXT                | + |
| GZB8C100M | lung           | ST8387 | Type V   | -                   | GEN/TET/FLR/FOS/CIP/SXT        | + |
| GZB8C105M | intestinal     | ST8387 | Type II  | -                   | GEN/TET/FLR/FOS/CIP/SXT        | + |
| GZB8C110M | intestinal     | ST746  | Type V   | -                   | TET/FLR/FOS/CIP/SXT            | + |
| GZB8C112M | intestinal     | ST8388 | Type V   | -                   | GEN/TET/FLR/SXT                | + |
| GZB8C113M | intestinal     | ST48   | Type I   | -                   | GEN/TET/FLR/CIP/SXT            | + |
| GZB8C114M | intestinal     | ST6725 | Type II  | -                   | GEN/TET/FLR/CIP/SXT            | + |
| GZB8C127M | soil           | ST6725 | Type II  | -                   | TET/FLR/CIP/SXT                | + |
| GZB8C133M | drinking water | ST8382 | Type V   | -                   | TET/FLR/FOS/CIP/SXT            | + |
| GZB8C139M | drinking water | ST6725 | Type II  | -                   | GEN/TET/FLR/FOS/CIP/SXT        | + |
| GZB8C141M | drinking water | ST8382 | Type V   | -                   | TET/FLR/FOS/CIP/SXT            | + |
| GZB8C146M | drinking water | ST10   | Type III | <i>mcr-1</i> /Incl2 | TET/FLR/CL/CIP/SXT             | + |
| GZB8C149M | drinking water | ST167  | Type IV  | -                   | GEN/AMI/TET/FLR/FOS/CIP/SXT    | - |
| GZB8C151M | drinking water | ST167  | Type IV  | <i>mcr-1</i> /Incl2 | GEN/AMI/TET/FLR/CL/FOS/CIP/SXT | - |
| GZB8C159M | feed           | ST167  | Type IV  | <i>mcr-1</i> /Incl2 | GEN/AMI/TET/FLR/CL/FOS/CIP/SXT | - |
| GZB8C163M | feed           | ST6725 | Type II  | -                   | GEN/TET/FLR/CIP/SXT            | + |
| GZB8C166M | feed           | ST10   | Type V   | <i>mcr-1</i> /Incl2 | GEN/TET/FLR/CL/FOS/SXT         | + |

Note: a: GEN, gentamycin; AMI, amikacin; TET, tigercycline; FLR, florfenicol; CL, colistin; FOS, fosfomycin; CIP, ciprofloxacin; SXT, sulfamethoxazole/trimethoprim.

b: Transconjugants: "+", Detect transconjugants; "-", No detect.
